# Supplementary material for: Efficacy and Safety of Lipase Inhibitor Orlistat in Japanese with Excessive Visceral Fat Accumulation: 24-Week, Double-Blind, Randomized, Placebo-Controlled Study
Source: Springer Nature journal article supplement (doi:10.1007/s12325-018-0835-5), 2018-12-10

## SUPPLEMENTAL MATERIAL

### Supplemental Fig. S1

(a) Percent change in waist circumference compared to baseline for only those participants who entered the post-observation term. Mean  $\pm$  SE.  $n$  (week 36): Orlistat, 75; Placebo, 73. \*,<sup>†</sup>One-sample  $t$ -test,  $p < 0.05$  compared to baseline

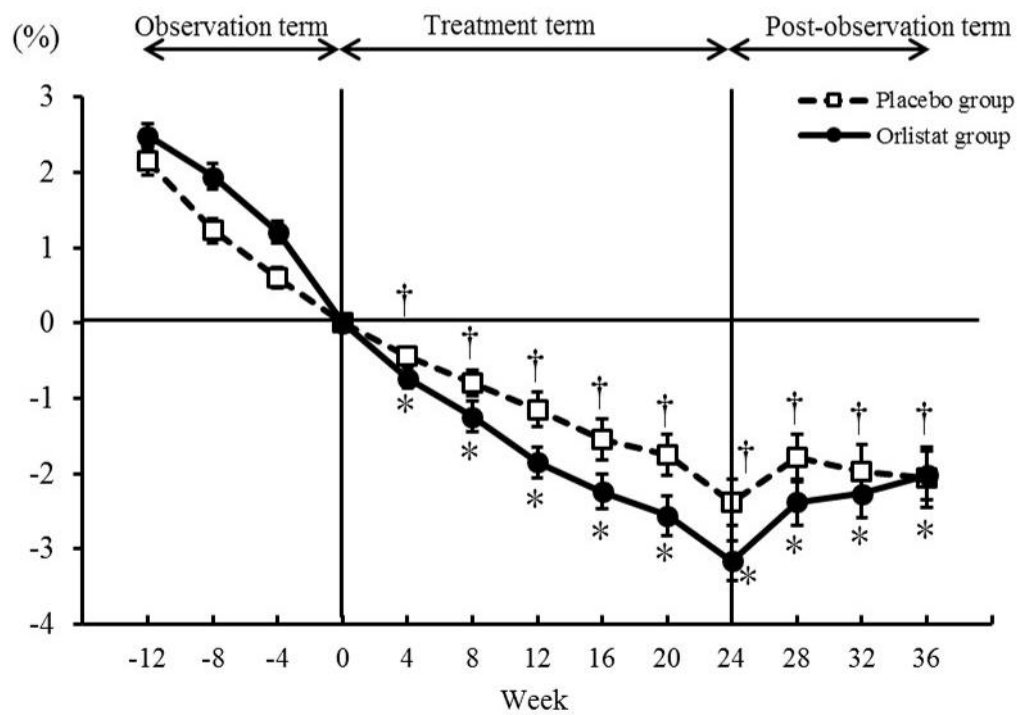

(b) Percent change in body weight compared to baseline. Mean  $\pm$  SE.  $n$  (post-observation week 12): Orlistat, 75; Placebo, 74. \*, †One-sample  $t$ -test,  $p < 0.05$  compared to baseline. SE standard error

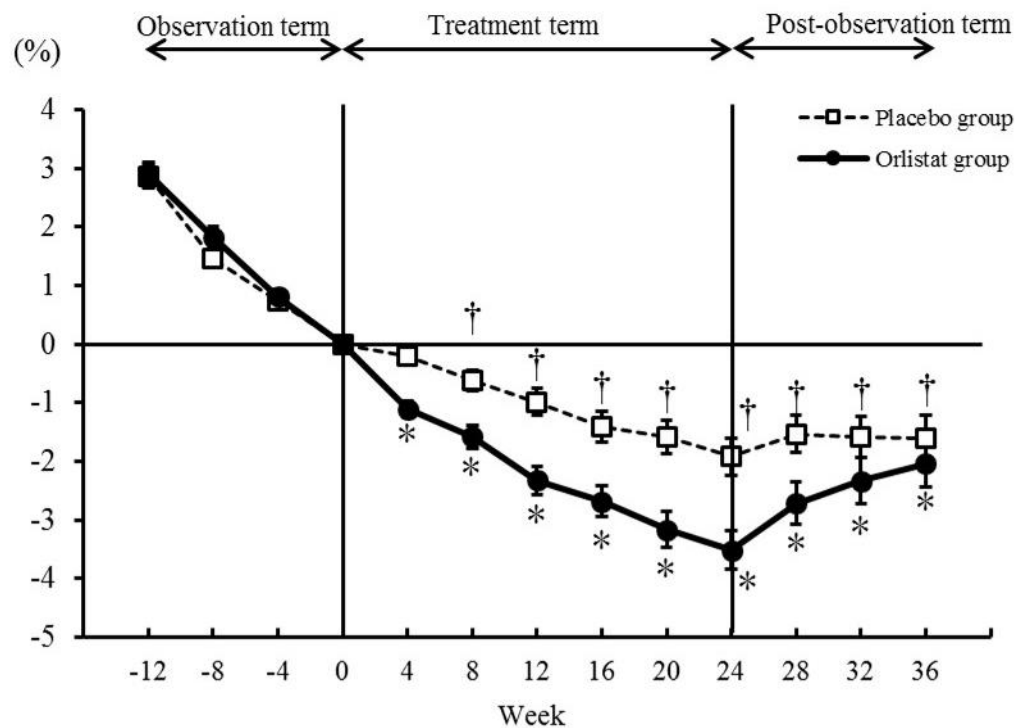

Supplement: MOESM1 [file 16329914]
